# Supplementary material for: Triterpenoids from Ainsliaea yunnanensis Franch. and Their Biological Activities
Source: MDPI journal article supplement (doi:10.3390/molecules21111481), 2016-11-07
Supplement: s1 [file s1]

# Supplementary Materials: Triterpenoids from *Ainsliaea yunnanensis* Franch. and Their Biological Activities

Jinjie Li, Bo Zhang, Hailing Liu, Xuan Zhang, Xiaoya Shang and Changqi Zhao

【Sample2-C31H50O2】 [M+Na]<sup>+</sup> theoretical value: 477.3703 [M-H]<sup>-</sup> theoretical value: 453.3738

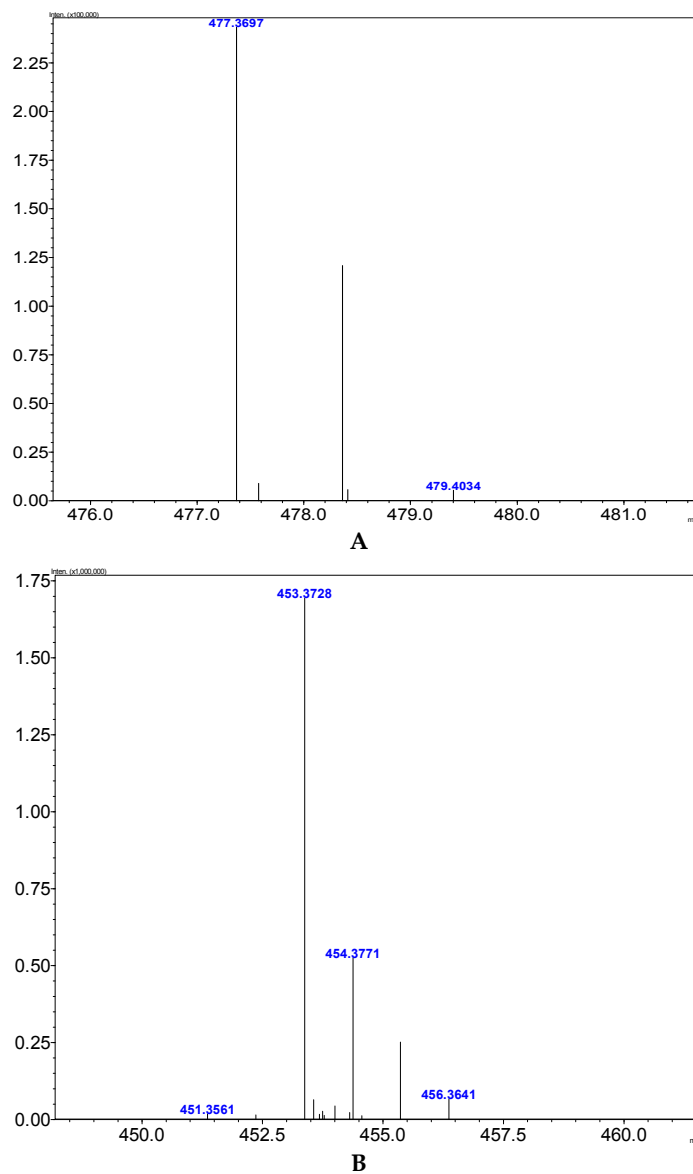

Figure S1. The HRESIMS Spectrum of Compound 1. (A) Positive mode; (B) Negative mode.

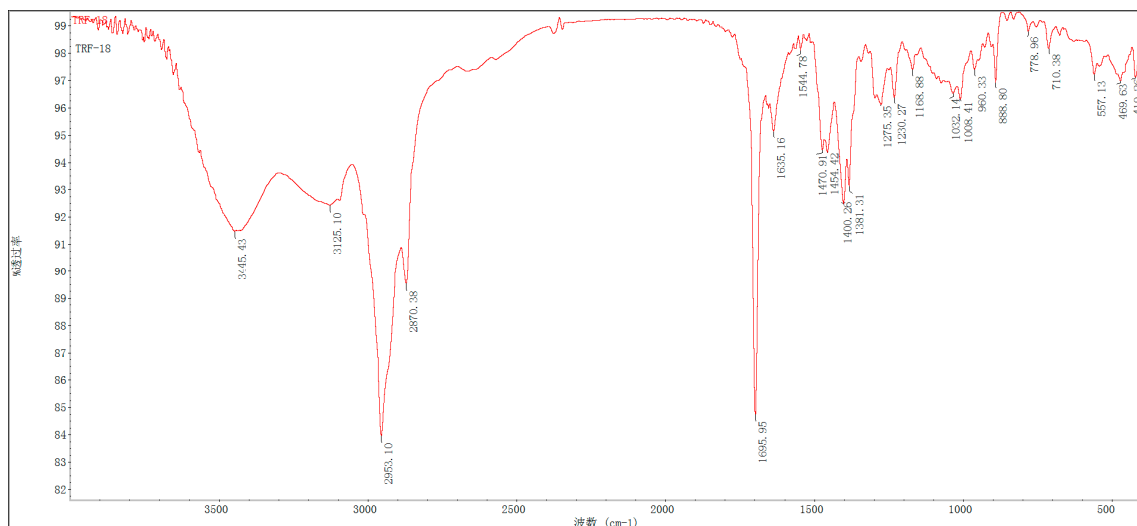

Figure S2. The IR Spectrum of Compound 1.

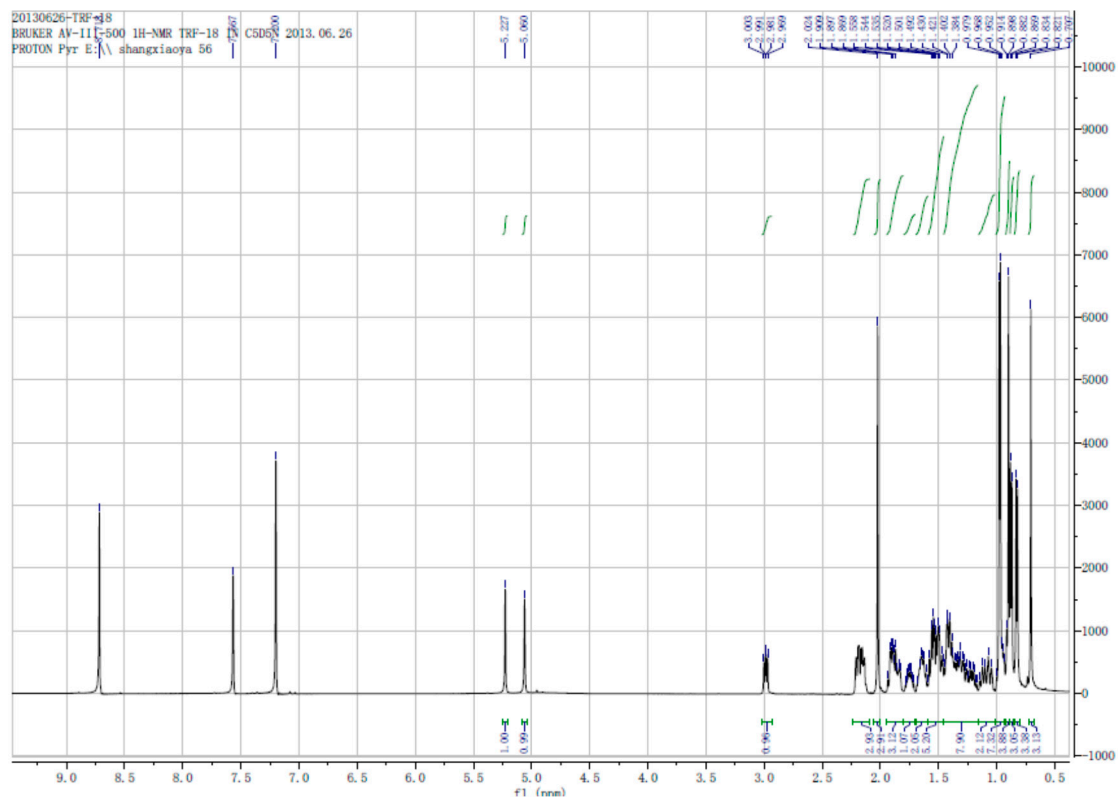Figure S3. The <sup>1</sup>H-NMR Spectrum of Compound 1 in Pyr.

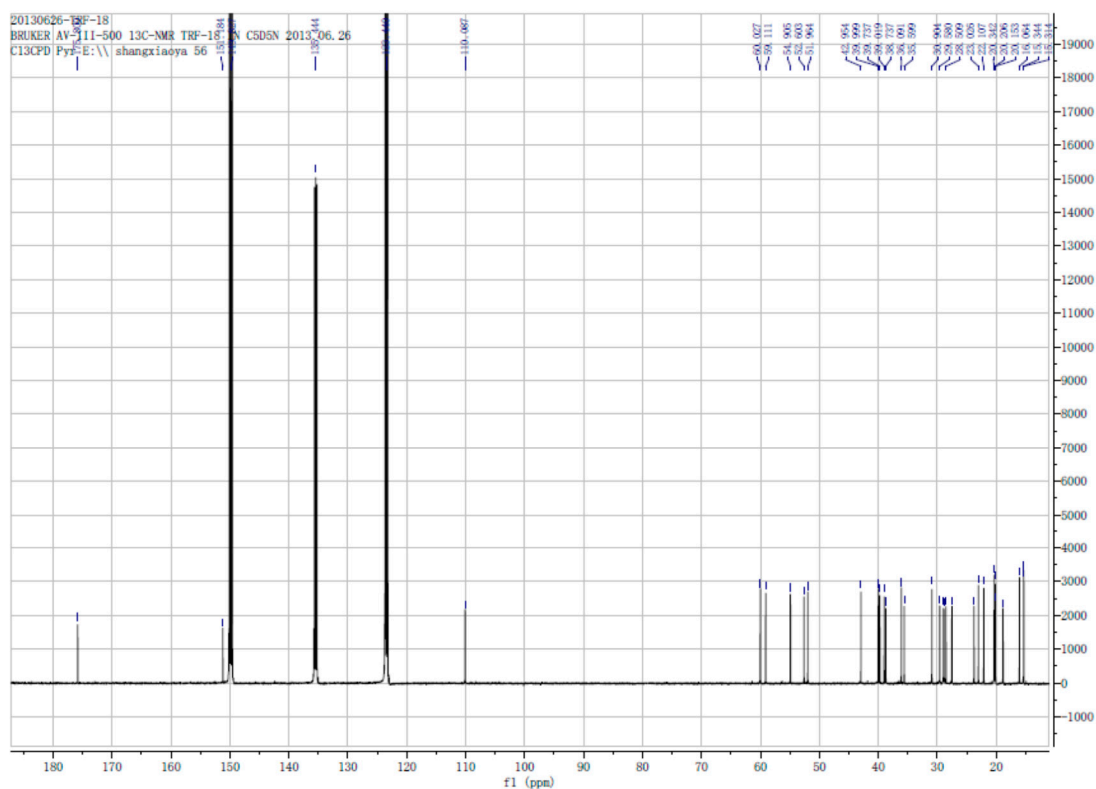Figure S4. The  $^{13}\text{C}$ -NMR Spectrum of Compound 1 in Pyr.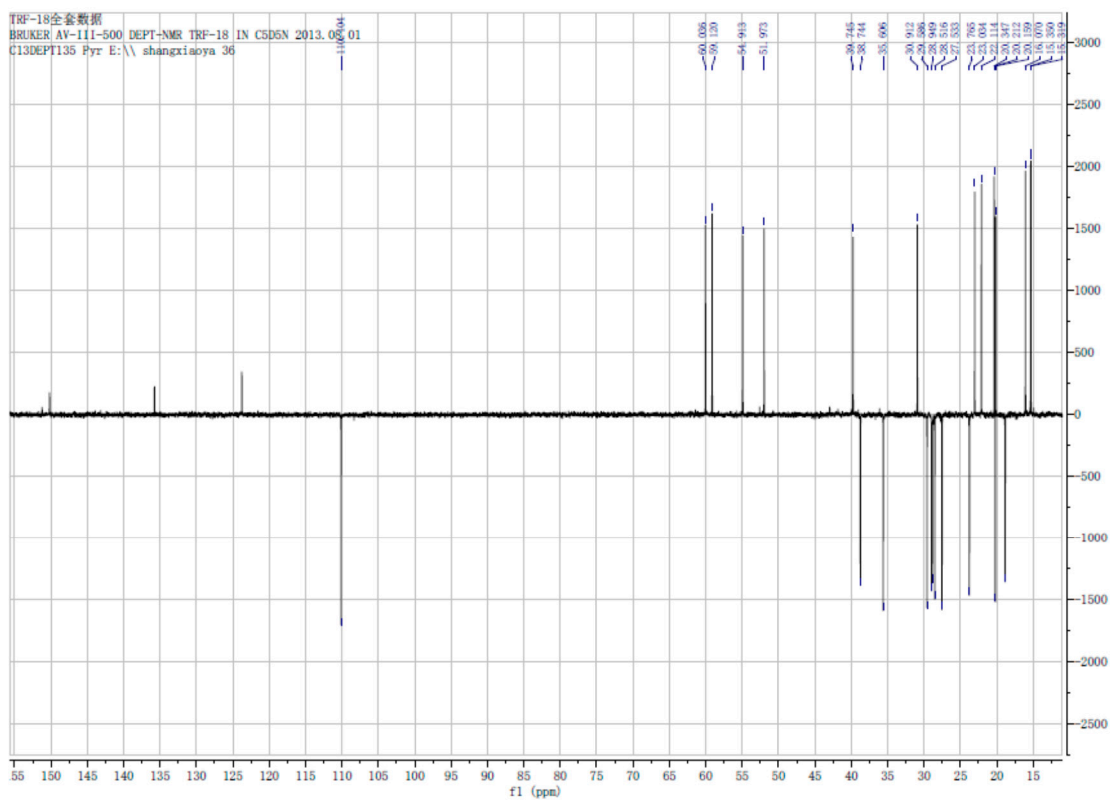

Figure S5. The DEPT 135 Spectrum of Compound 1 in Pyr.

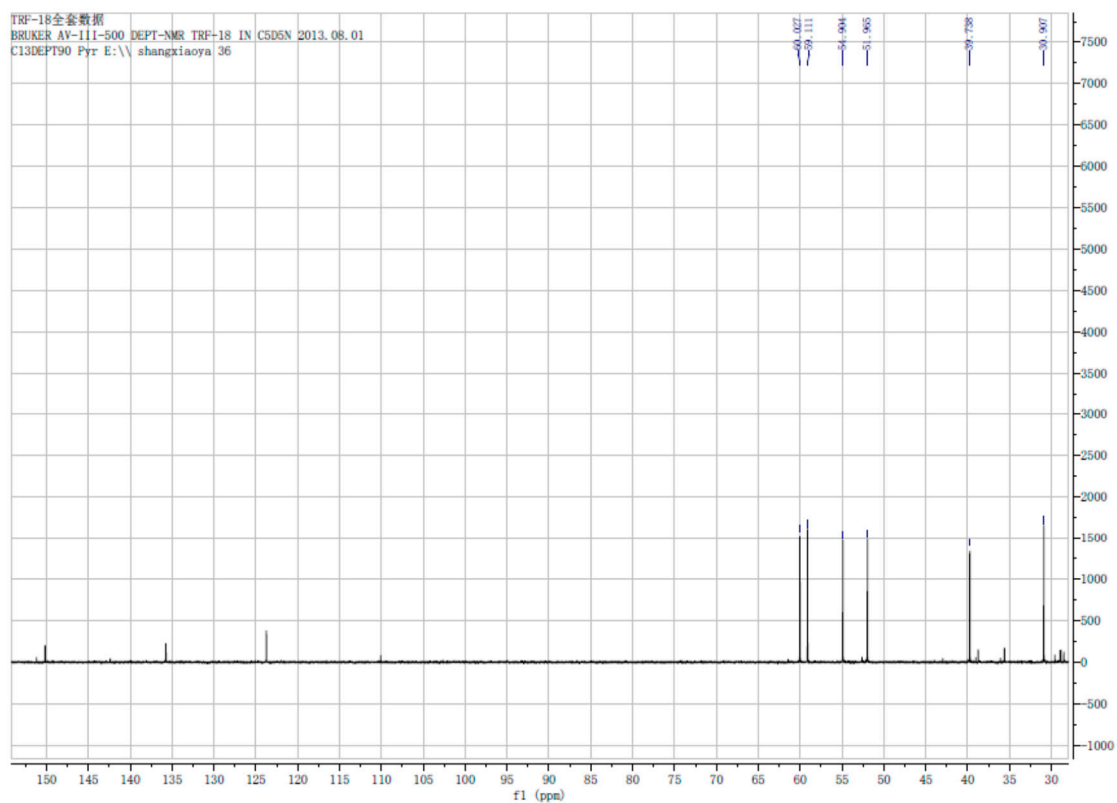

Figure S6. The DEPT 90 Spectrum of Compound 1 in Pyr.

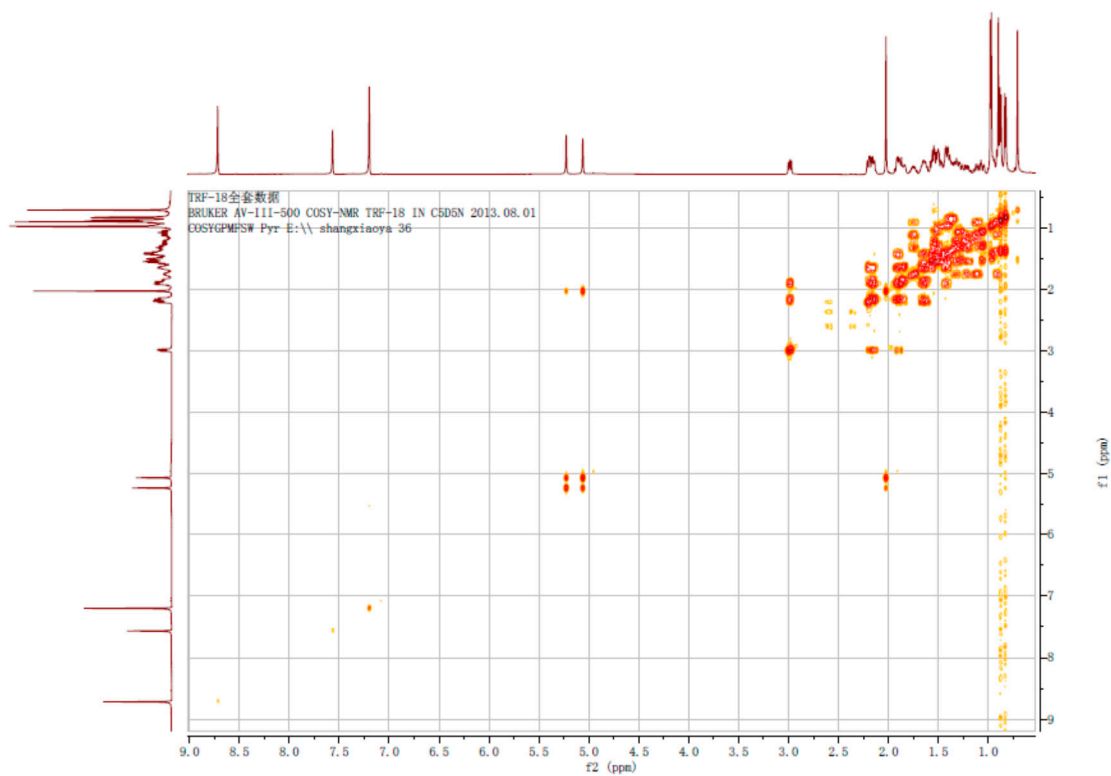

Figure S7. The  $^1\text{H}$ - $^1\text{H}$  COSY Spectrum of Compound 1 in Pyr.

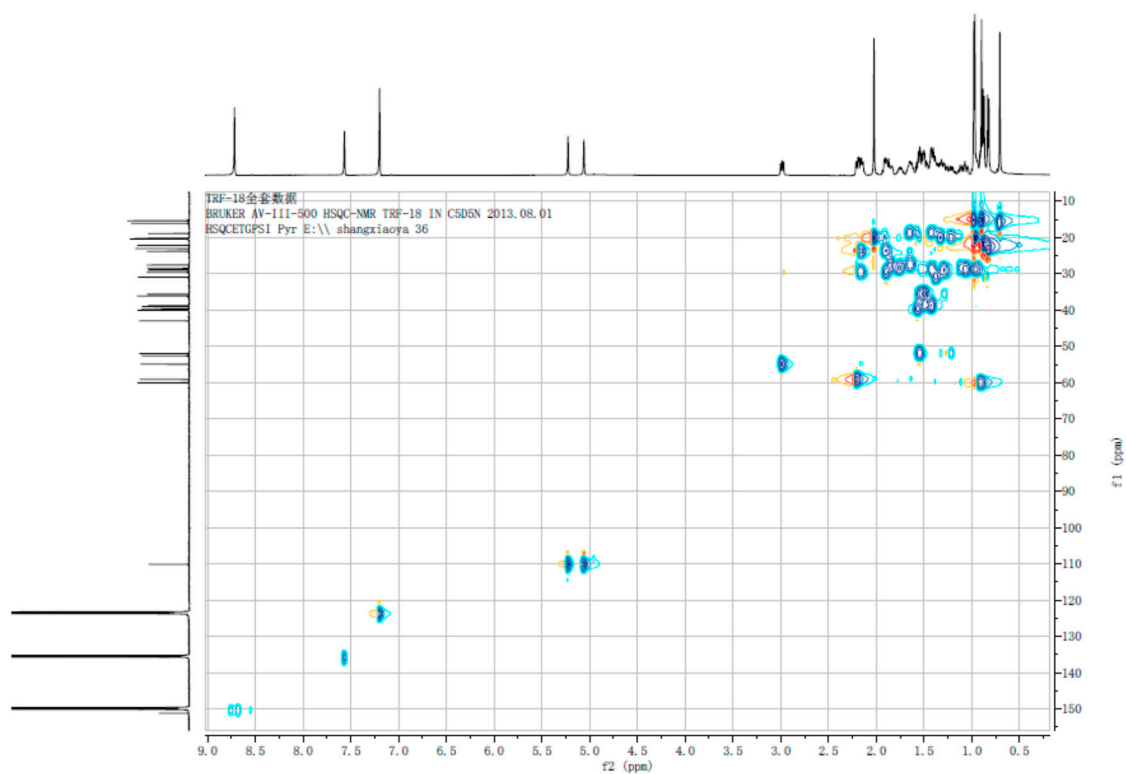

Figure S8. The HSQC Spectrum of Compound 1 in Pyr.

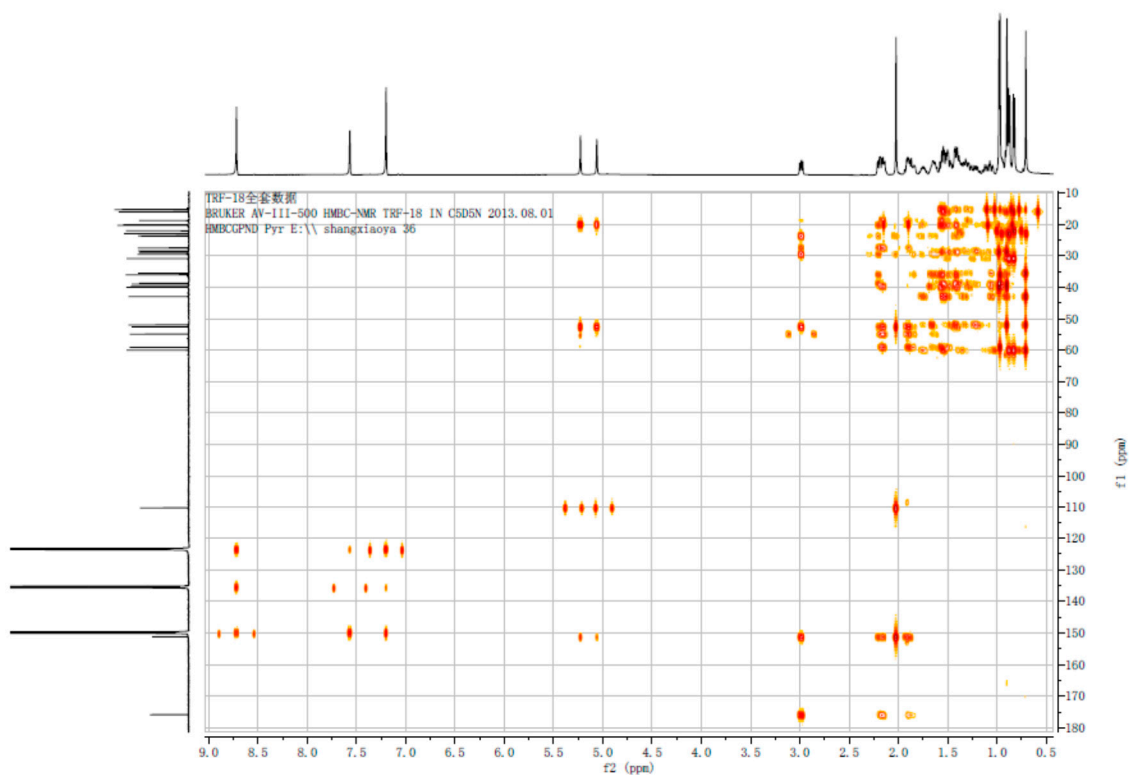

Figure S9. The HMBC Spectrum of Compound 1 in Pyr.

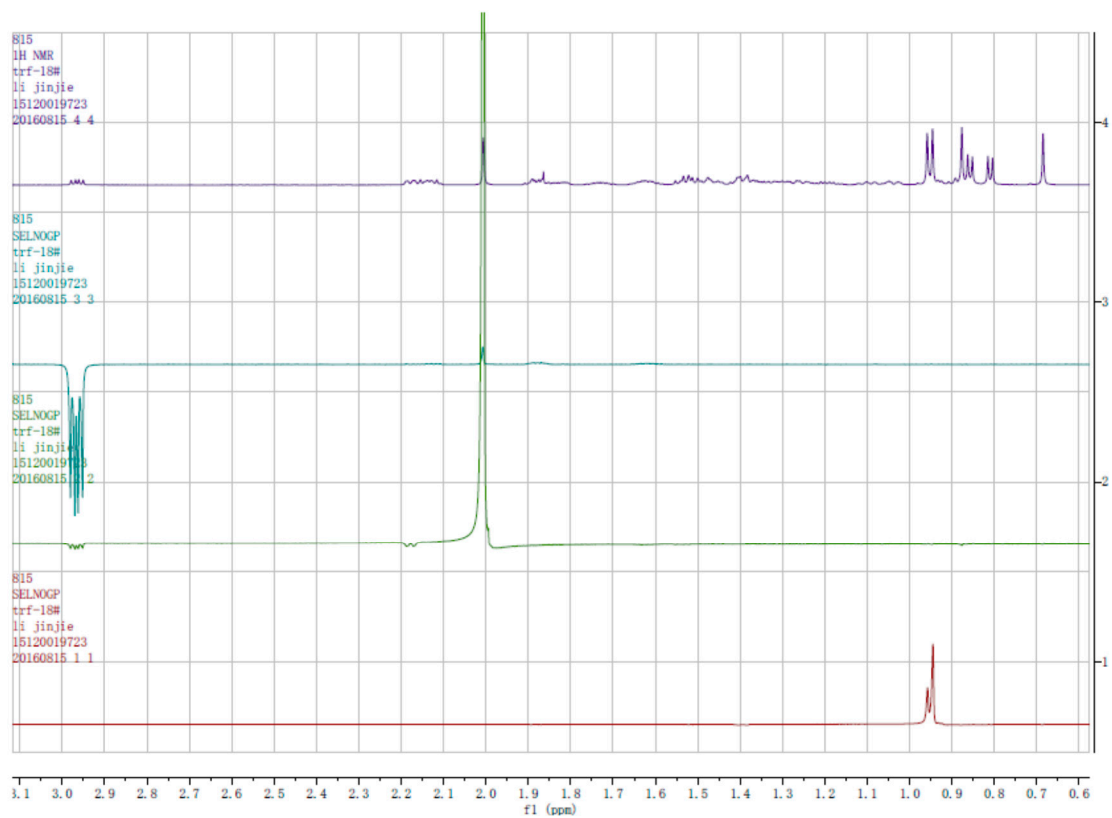

Figure S10. The NOE-1 Spectrum of Compound 1 in Pyr.

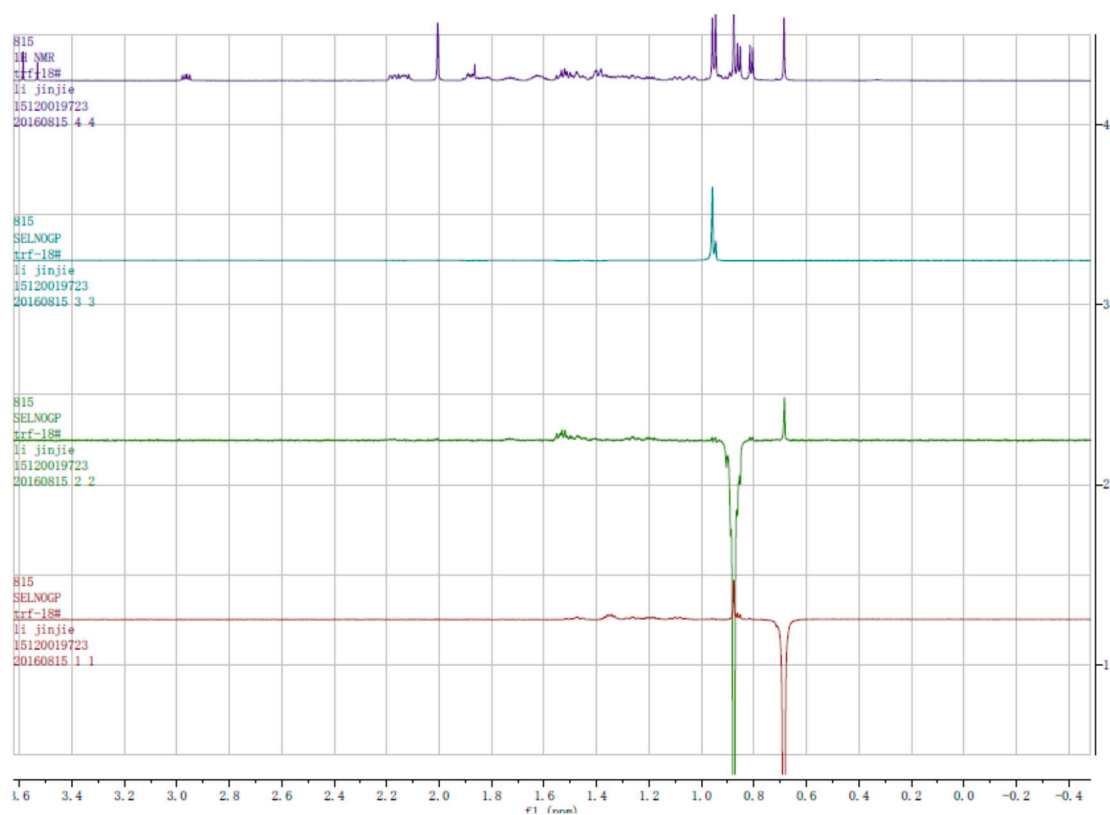

Figure S11. The NOE-2 Spectrum of Compound 1 in Pyr.



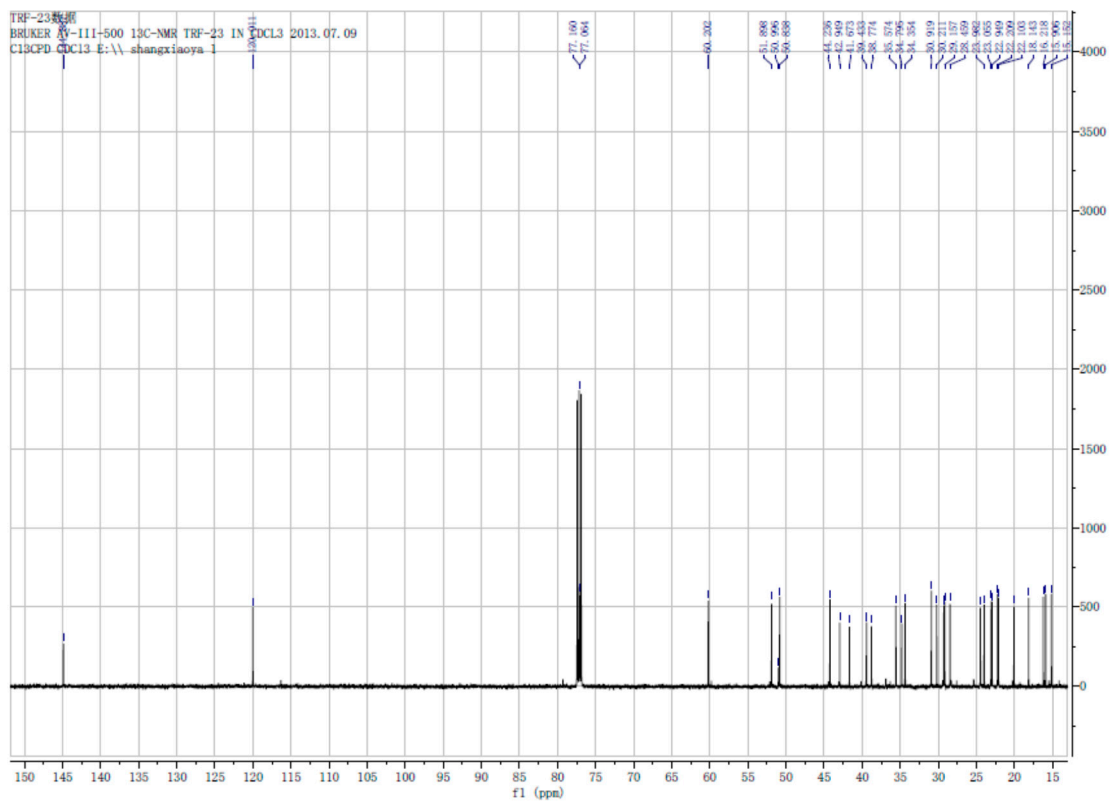Figure S14. The  $^{13}\text{C}$ -NMR Spectrum of Compound 2 in  $\text{CDCl}_3$ .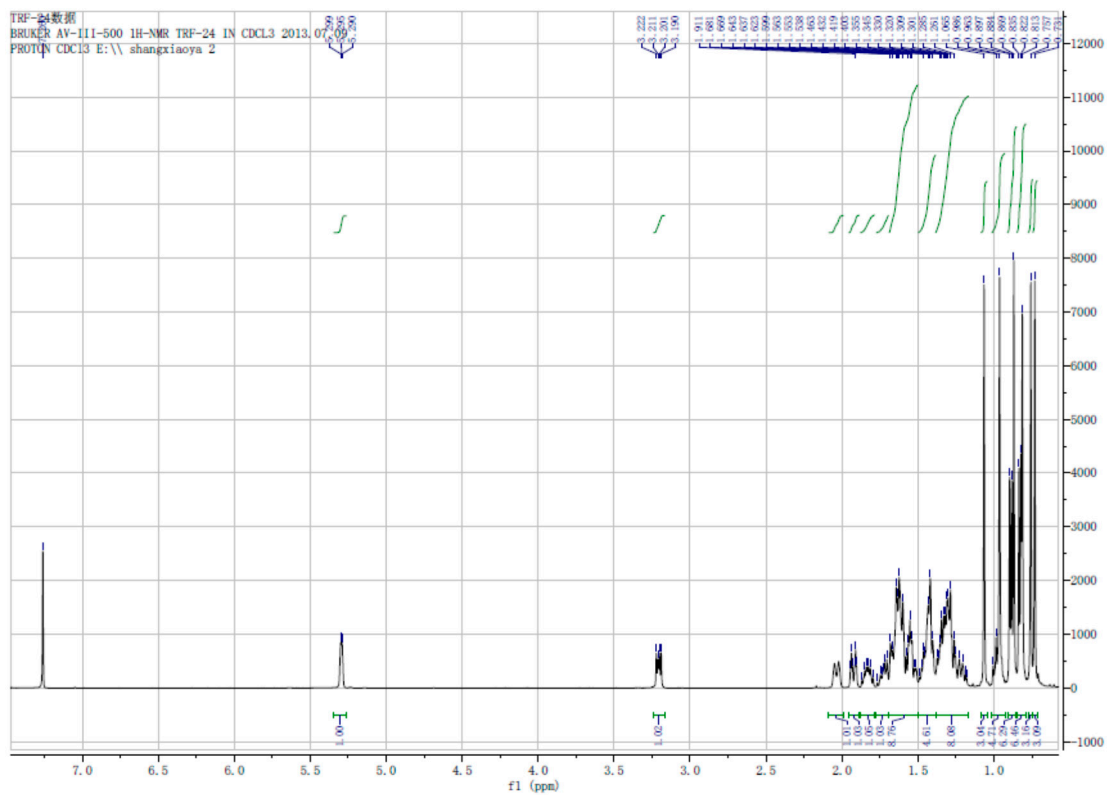Figure S15. The  $^1\text{H}$ -NMR Spectrum of Compound 3 in  $\text{CDCl}_3$ .



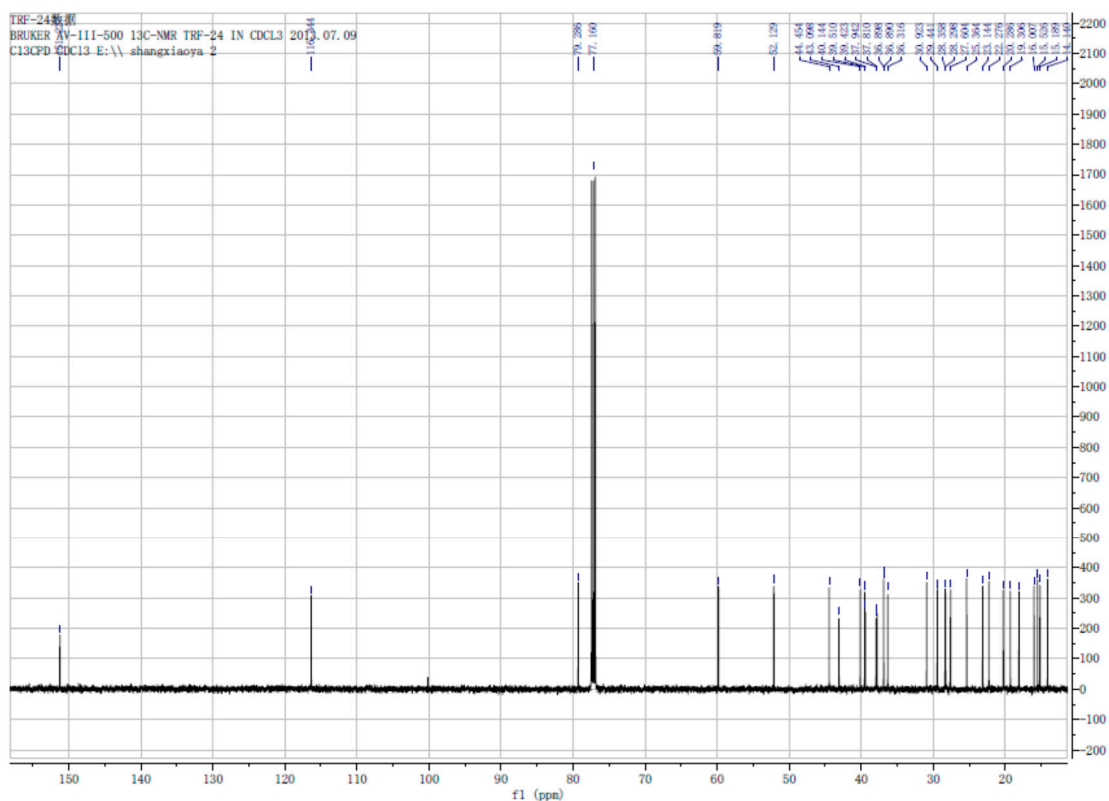Figure S16. The  $^{13}\text{C}$ -NMR Spectrum of Compound 3 in  $\text{CDCl}_3$ .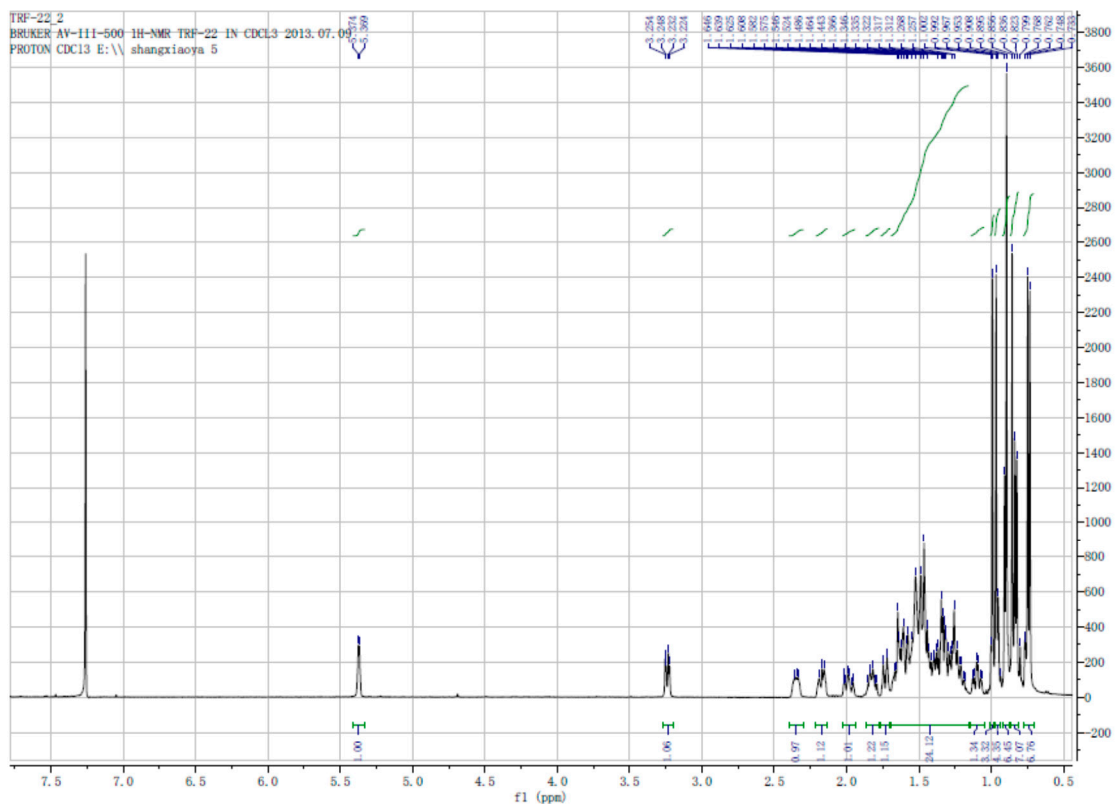Figure S17. The  $^1\text{H}$ -NMR Spectrum of Compound 4 in  $\text{CDCl}_3$ .

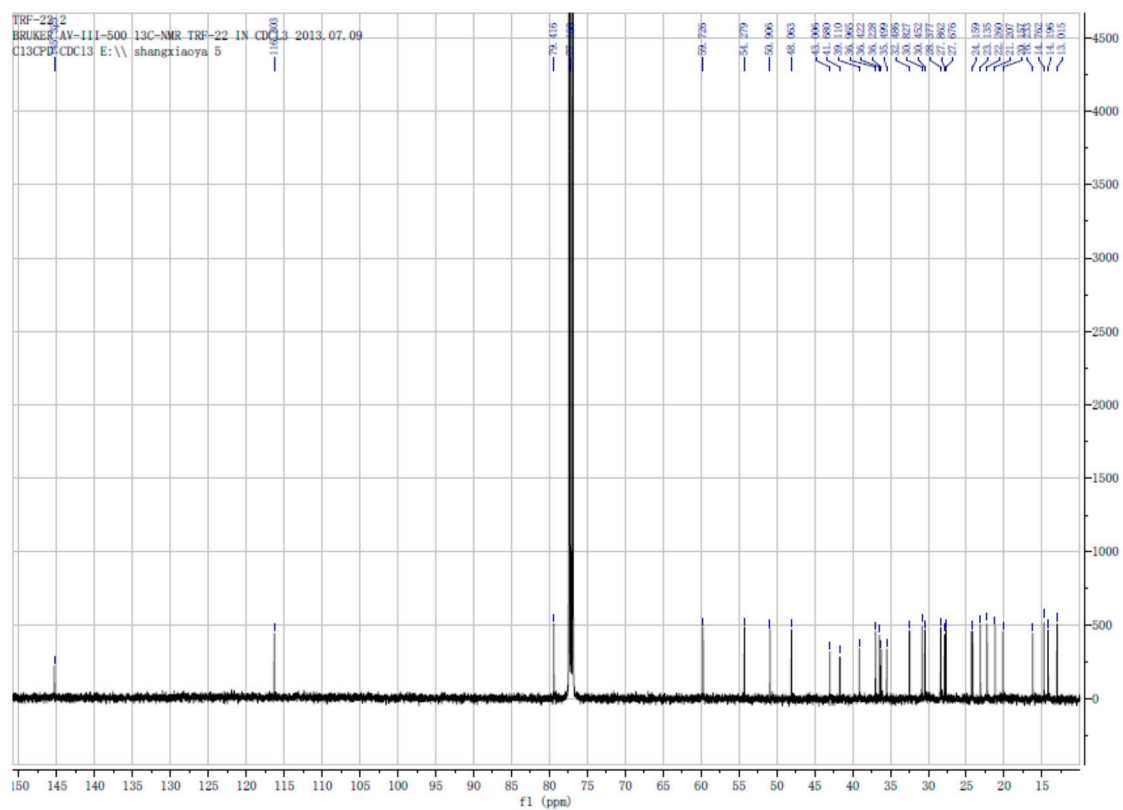

Figure S18. The  $^{13}\text{C}$ -NMR Spectrum of Compound 4 in  $\text{CDCl}_3$ .
